# Supplementary material for: In vivo demonstration of an active tumor pretargeting approach with peptide nucleic acid bioconjugates as complementary system
Source: PubMed Central journal article supplement — Chem Sci. 2015 Jun 17;6(10):5601–16. doi: 10.1039/c5sc00951k (PMC5949856; doi:10.1039/c5sc00951k), 2015-06-17
Supplement: SC-006-C5SC00951K-s001.pdf [file SC-006-C5SC00951K-s001.pdf]

## Supplementary Information

# ***In vivo* Demonstration of an Active Tumor Pretargeting Approach with Peptide Nucleic Acid Bioconjugates as Complementary System**

*Anna Leonidova,<sup>a,#</sup> Christian Foerster,<sup>b,c,#</sup> Kristof Zarschler,<sup>b</sup> Maik Schubert,<sup>b</sup> Hans-Jürgen Pietzsch,<sup>b</sup> Jörg Steinbach,<sup>b</sup> Ralf Bergmann,<sup>b</sup> Nils Metzler-Nolte,<sup>d</sup> Holger Stephan<sup>b,\*</sup> and Gilles Gasser<sup>a,\*</sup>*

<sup>a</sup> Department of Chemistry, University of Zurich, Winterthurerstrasse 190, CH-8057 Zurich, Switzerland.

<sup>b</sup> Helmholtz-Zentrum Dresden-Rossendorf, Institute of Radiopharmaceutical Cancer Research, Bautzner Landstraße 400, D-01328 Dresden, Germany.

<sup>c</sup> Department of Oncology, University of Alberta, 11560 University Avenue, Edmonton, Alberta, T6G1Z2, Canada.

<sup>d</sup> Lehrstuhl für Anorganische Chemie I – Bioanorganische Chemie, Fakultät für Chemie und Biochemie, Ruhr-Universität Bochum, Universitätsstrasse 150, D-44801 Bochum, Germany.

\* Corresponding authors: email: [h.stephan@hzdr.de](mailto:h.stephan@hzdr.de); Tel.: +49 351 2603091; WWW: <http://www.hzdr.de/NanoscalicSystems>; email: [gilles.gasser@chem.uzh.ch](mailto:gilles.gasser@chem.uzh.ch), Tel.: +41 44 635 46 30; WWW: [www.gassergroup.com](http://www.gassergroup.com); # These authors have contributed equally to the work.

## Table of Contents

|                                                                                                                                                |        |
|------------------------------------------------------------------------------------------------------------------------------------------------|--------|
| <b>Figures S1-14.</b> Characterization of the PNAs used this study                                                                             | S2-S14 |
| <b>Figure S15.</b> Radio HPLC of [ <sup>99m</sup> Tc](Tc-Dpa)-(Cys-PEG <sub>10kDa</sub> )-PNA                                                  | S15    |
| <b>Table S1.</b> Melting temperatures (T <sub>M</sub> ) for three complementary 17-mer PNA systems                                             | S16    |
| <b>Figure S16.</b> Melting curves of different PNAs                                                                                            | S17    |
| <b>Figure S17.</b> Radio HPLC of the [ <sup>99m</sup> Tc](Tc-Dpa)-(Cys-PEG <sub>10kDa</sub> )-PNA (original), in rat arterial blood plasma     | S18    |
| <b>Table S2.</b> Biodistribution of radiolabeled PNAs in Wistar rats (%ID mean±SD)                                                             | S19    |
| <b>Table S3.</b> Biodistribution of radiolabeled PNAs in Wistar rats (SUV mean±SD)                                                             | S20    |
| <b>Figure S18.</b> SPECT/CT comparison of the biodistribution of [ <sup>99m</sup> Tc](Tc-Dpa)-(Cys-PEG <sub>10kDa</sub> )-PNA in rat and mouse | S21    |
|                                                                                                                                                | S1     |

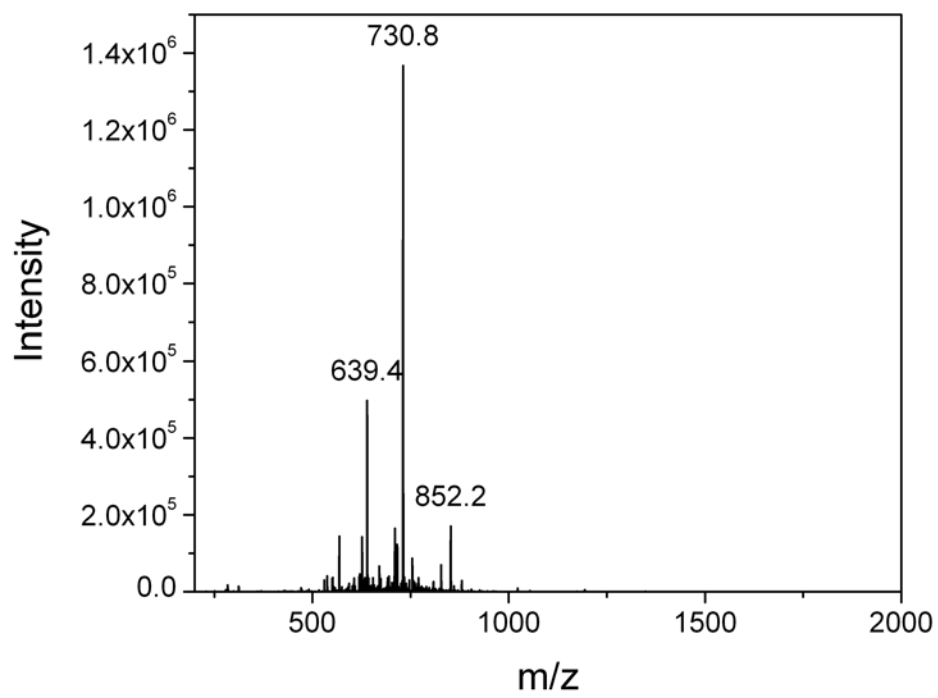

**Figure S1.** ESI-MS spectrum of Cys-PNA.

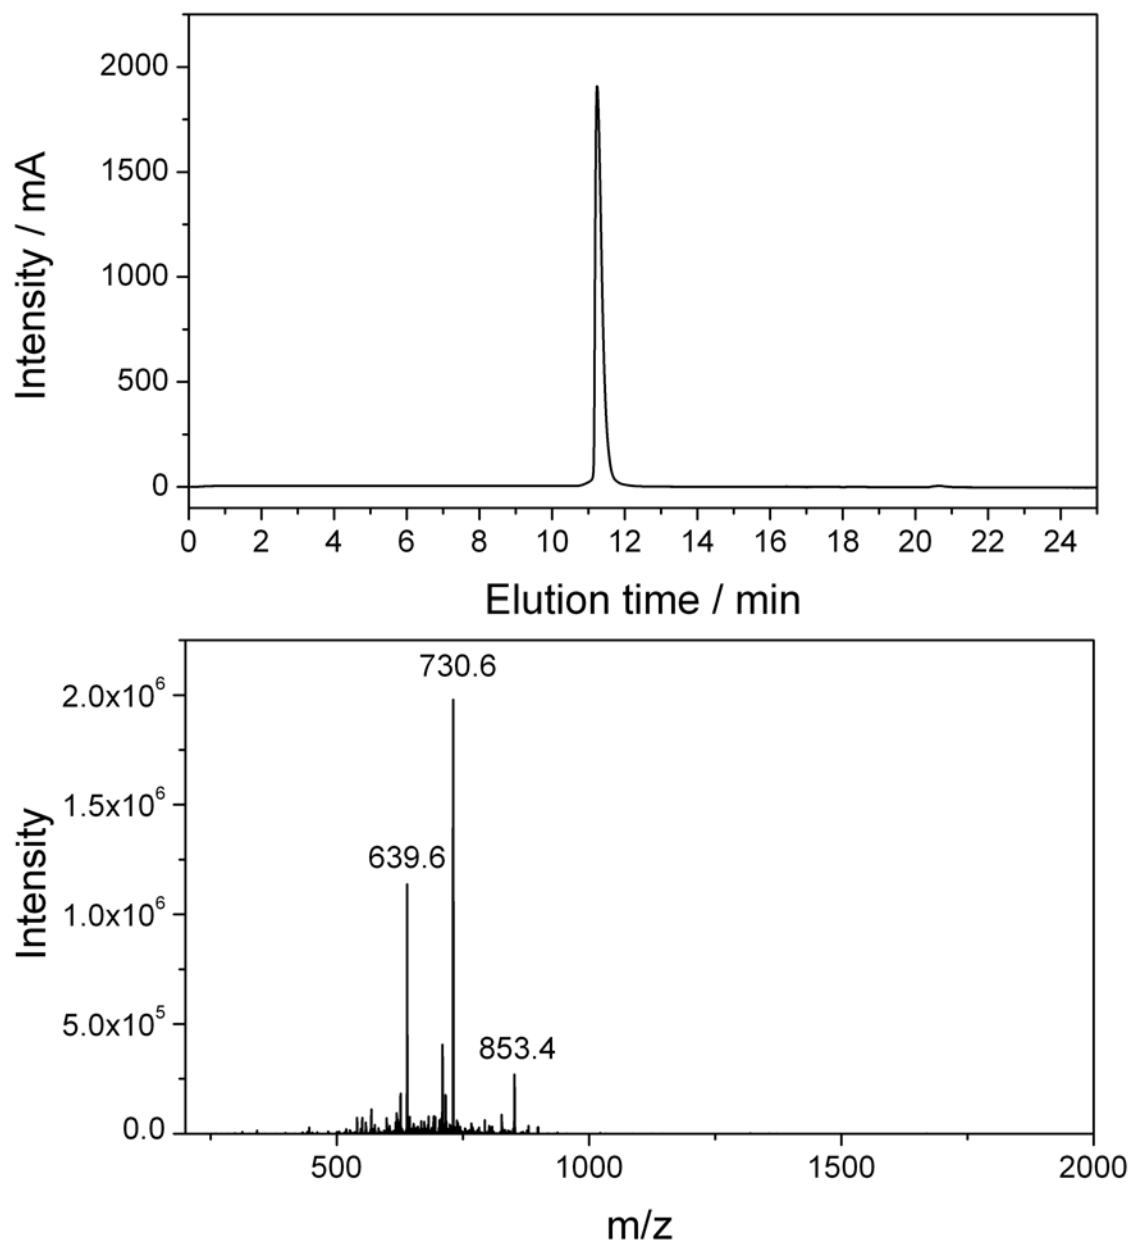

**Figure S2.** LC-MS spectrum of **Cys-PNA**.

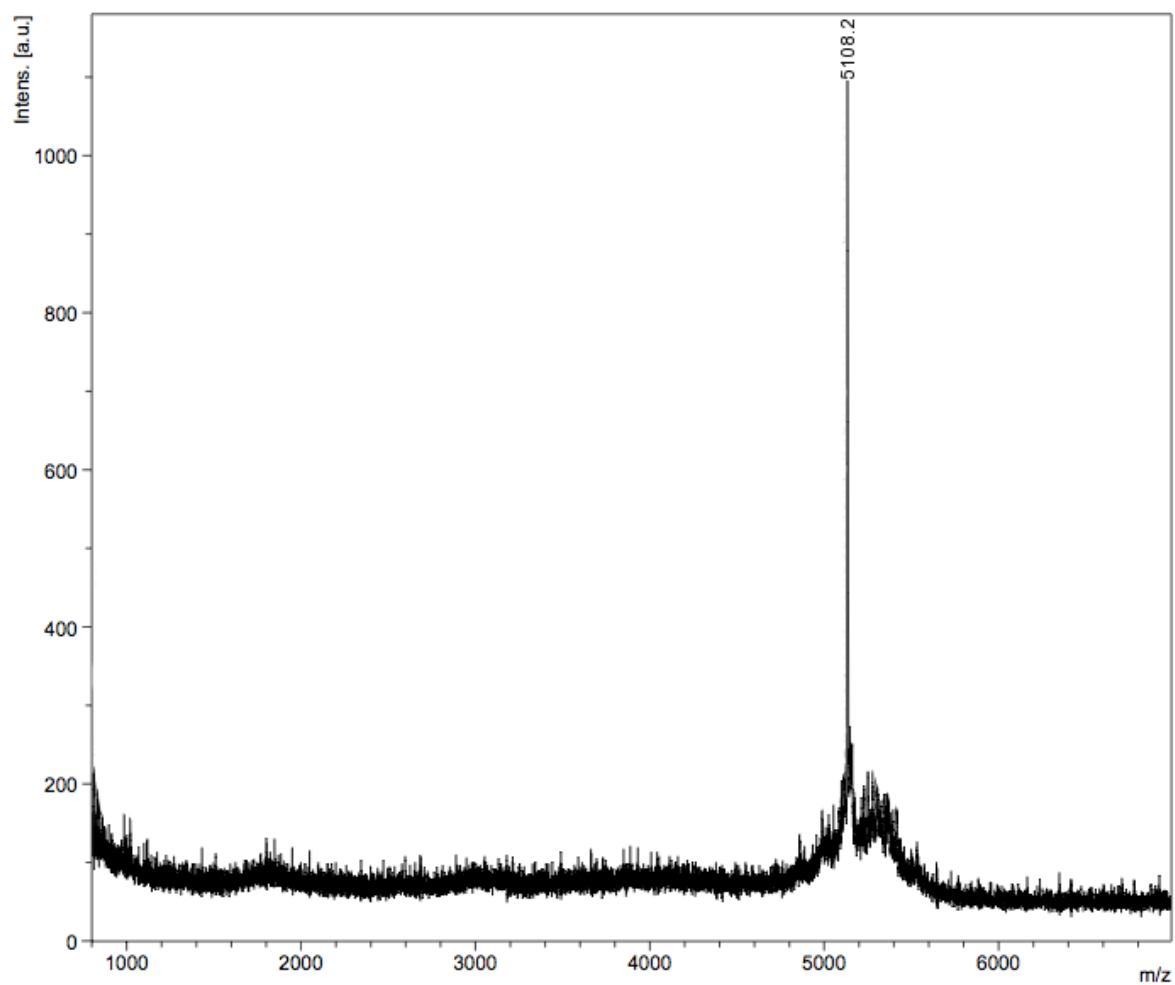

**Figure S3.** MALDI-TOF spectrum of Cys-PNA.

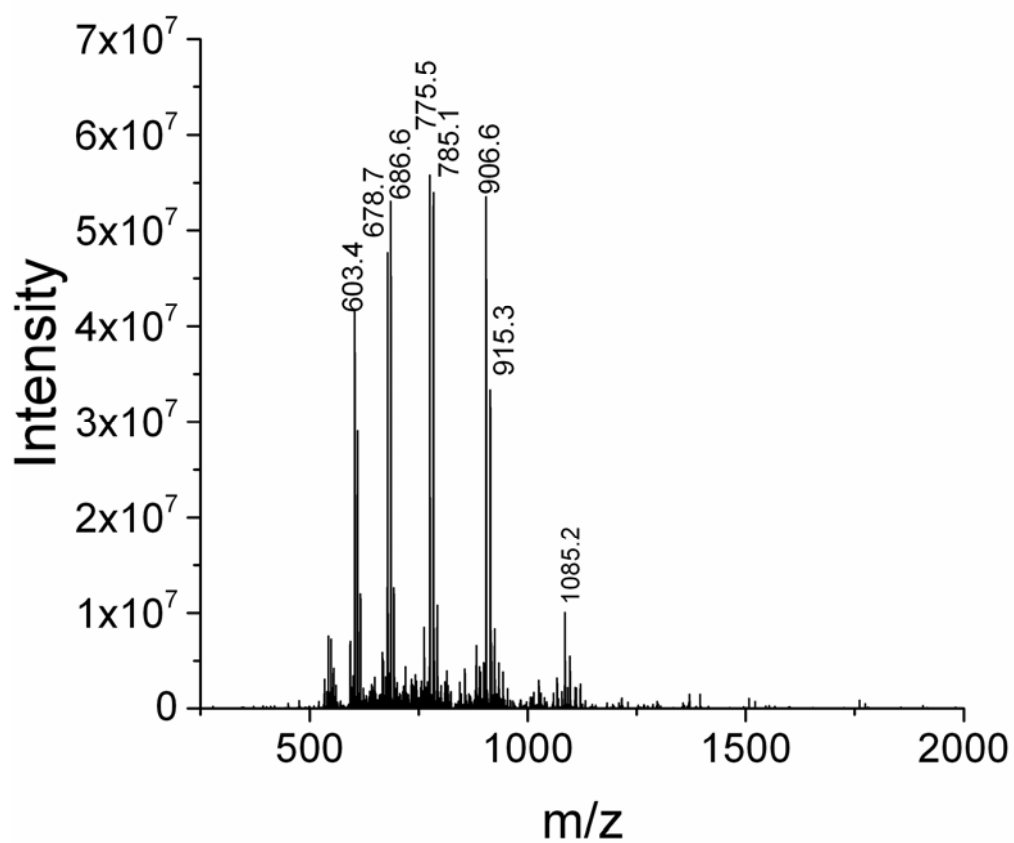

**Figure S4.** ESI-MS spectrum of **Dpa-PNA**.

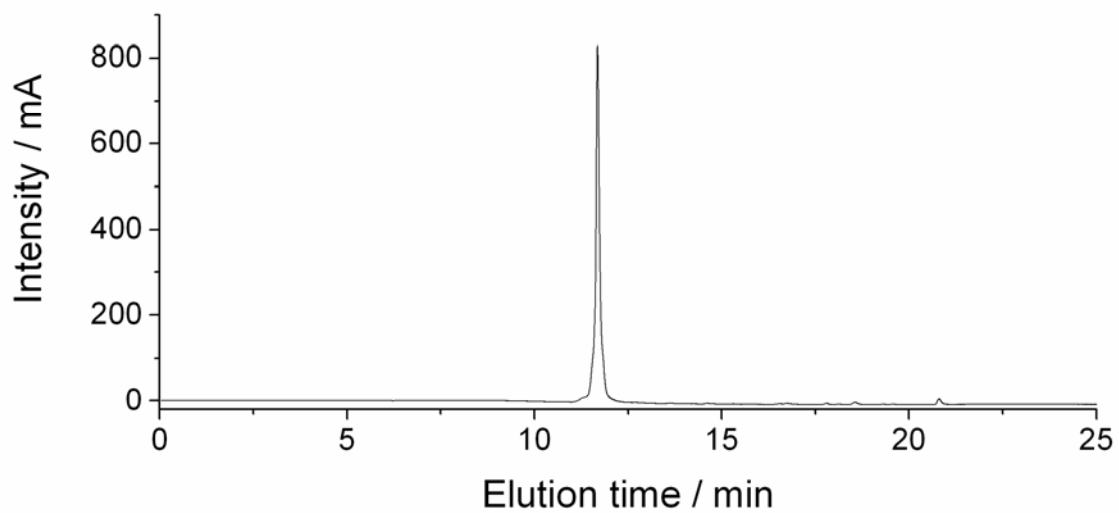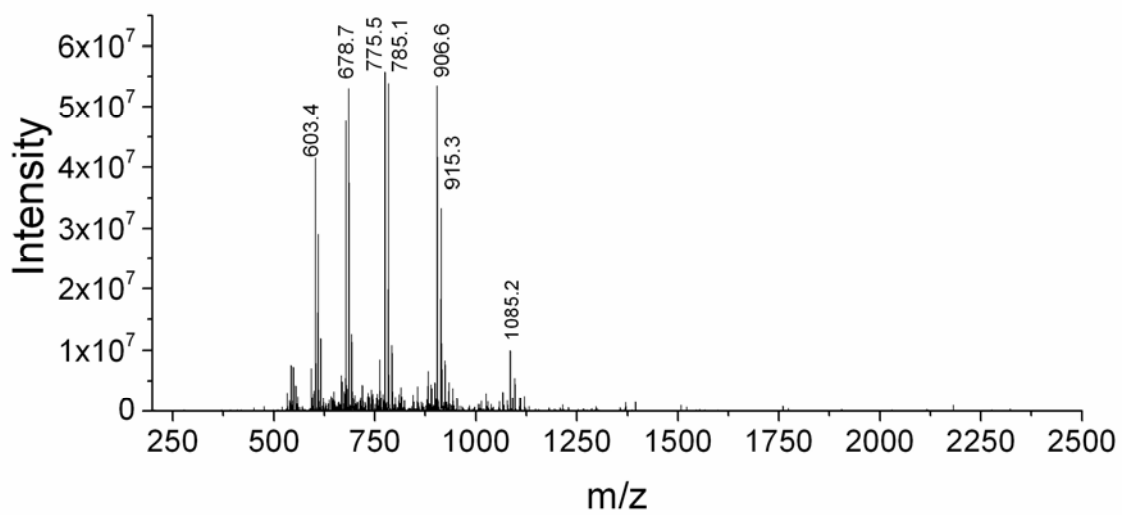

**Figure S5.** LC-MS spectrum of **Dpa-PNA**.

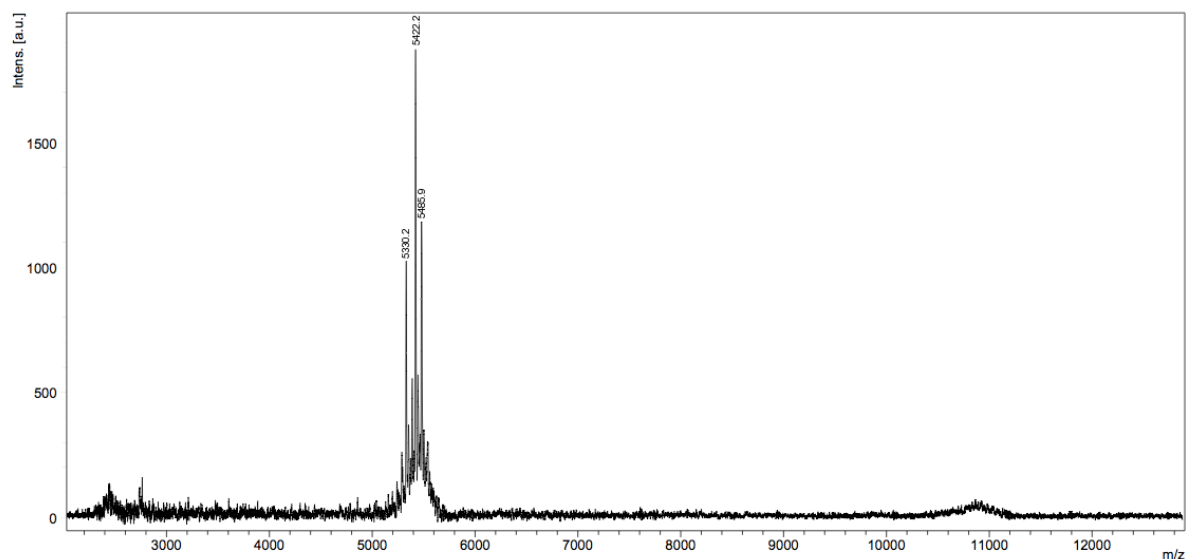

**Figure S6.** MALDI-TOF spectrum of **Dpa-PNA**.

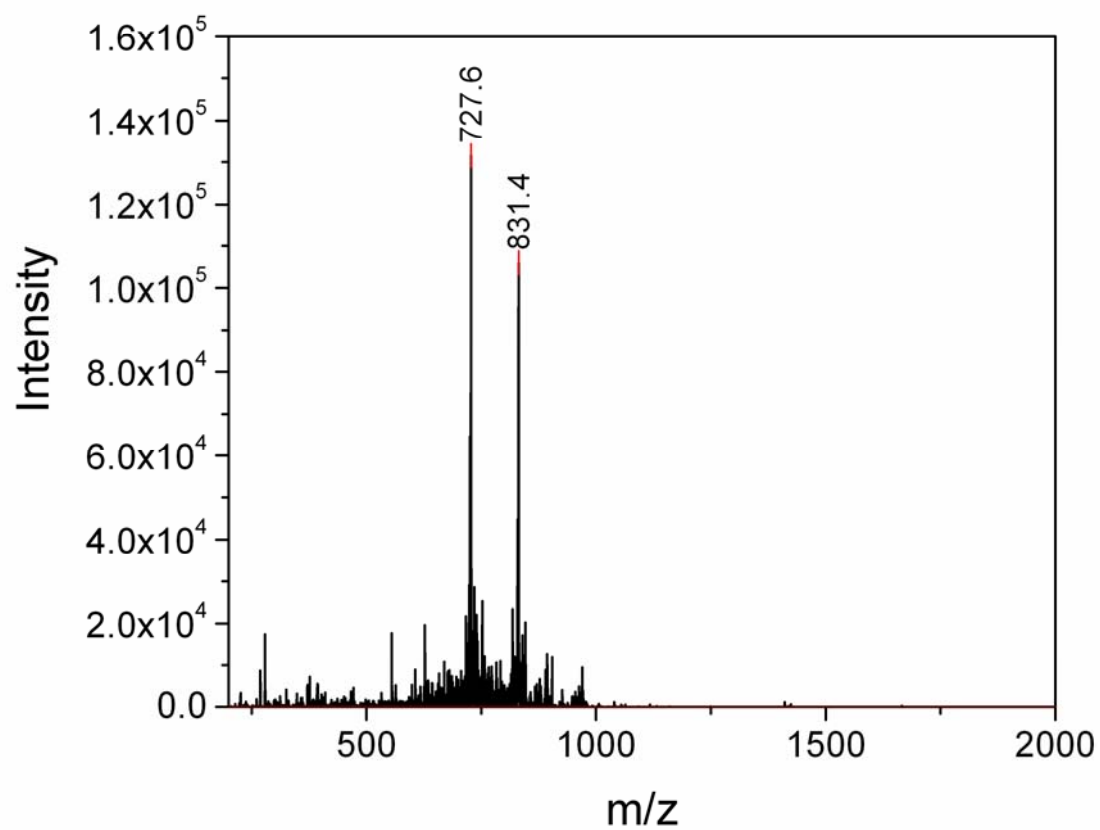

**Figure S7.** ESI-MS spectrum of **Dpa-Cys-PNA**.

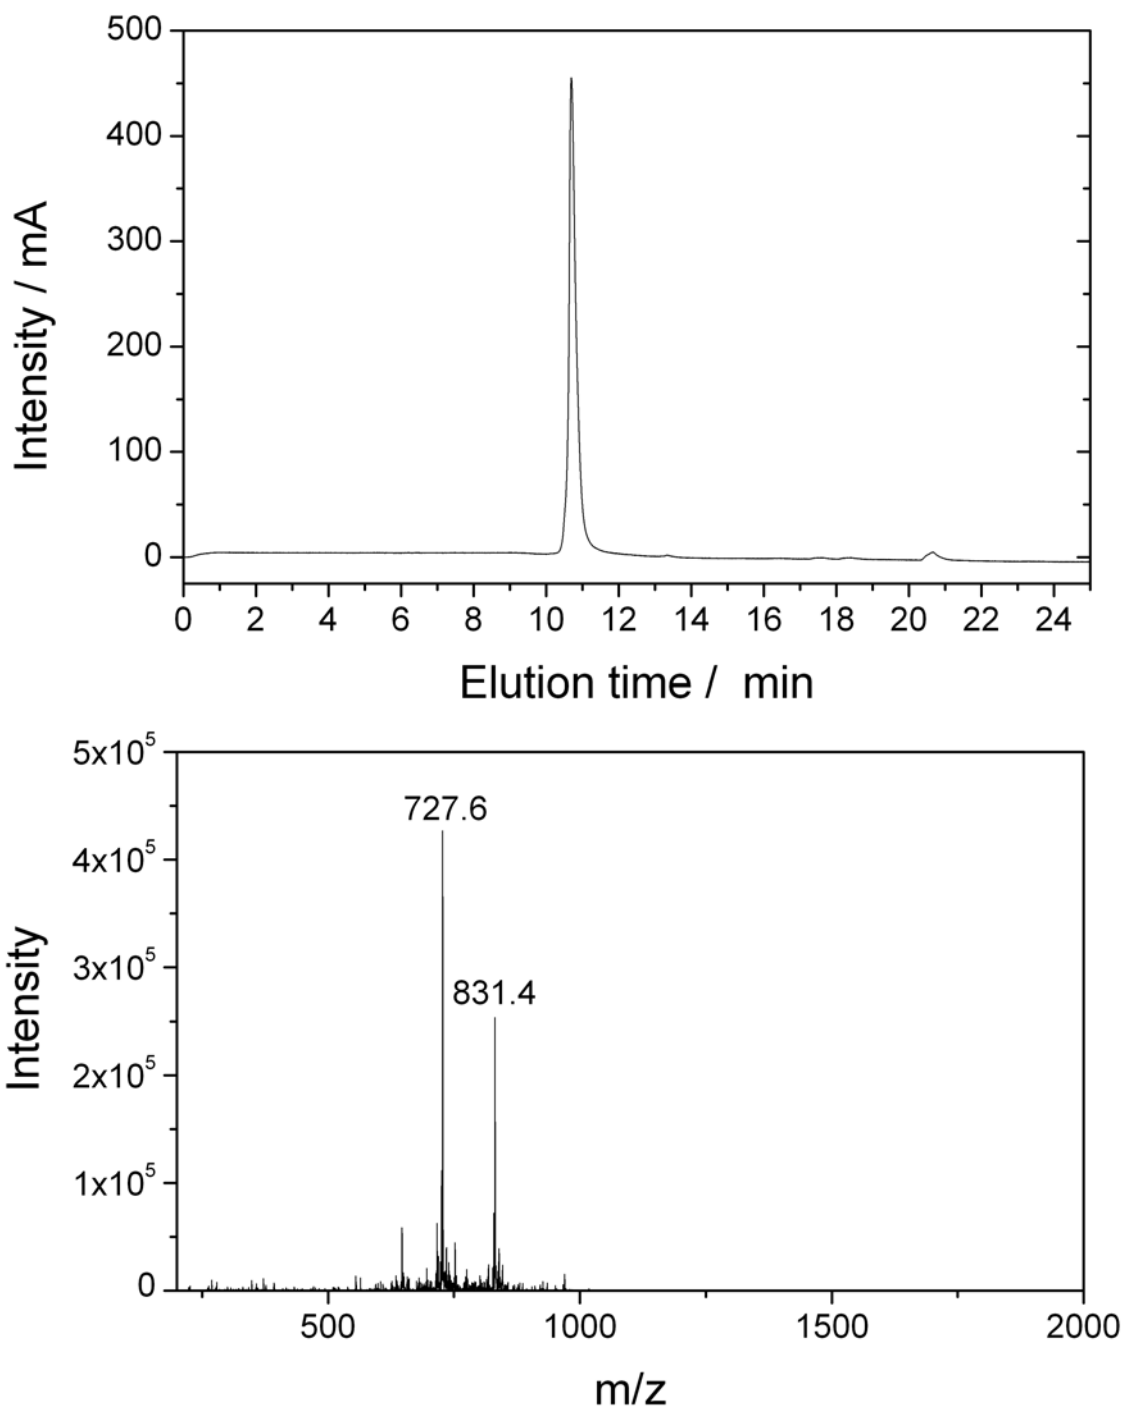

**Figure S8.** LC-MS spectrum of **Dpa-Cys-PNA**.



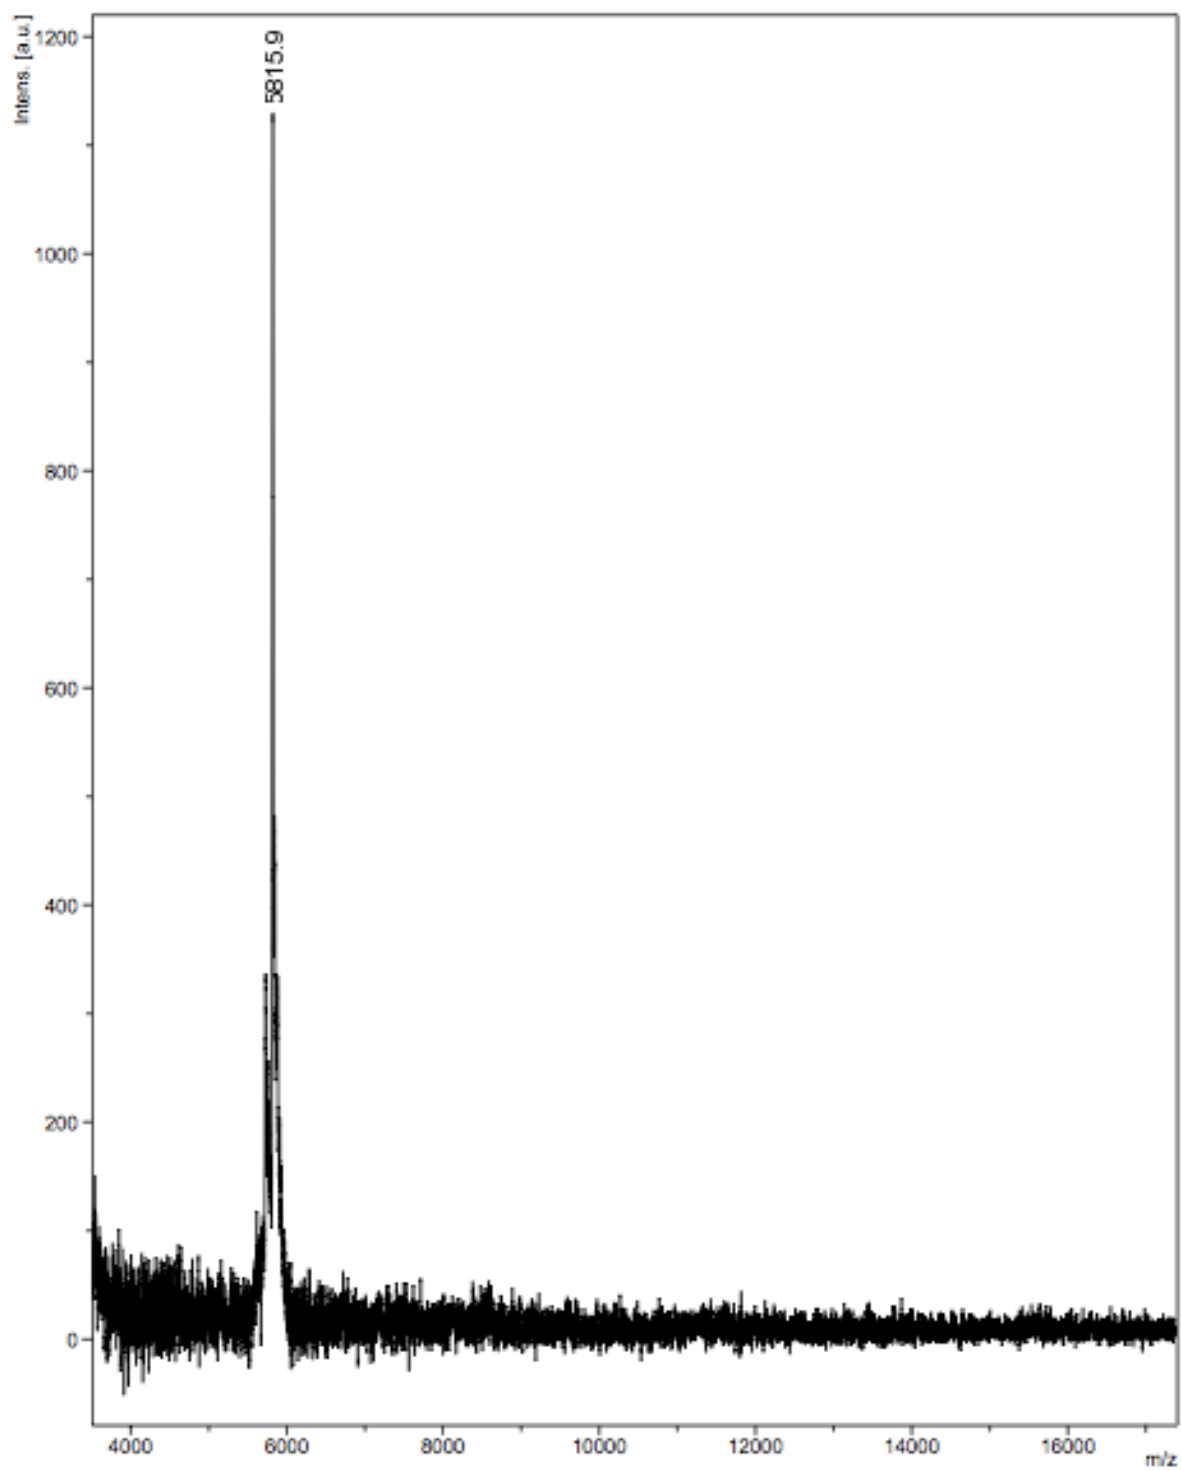

**Figure S9.** MALDI-TOF spectrum of **Dpa-Cys-PNA**.

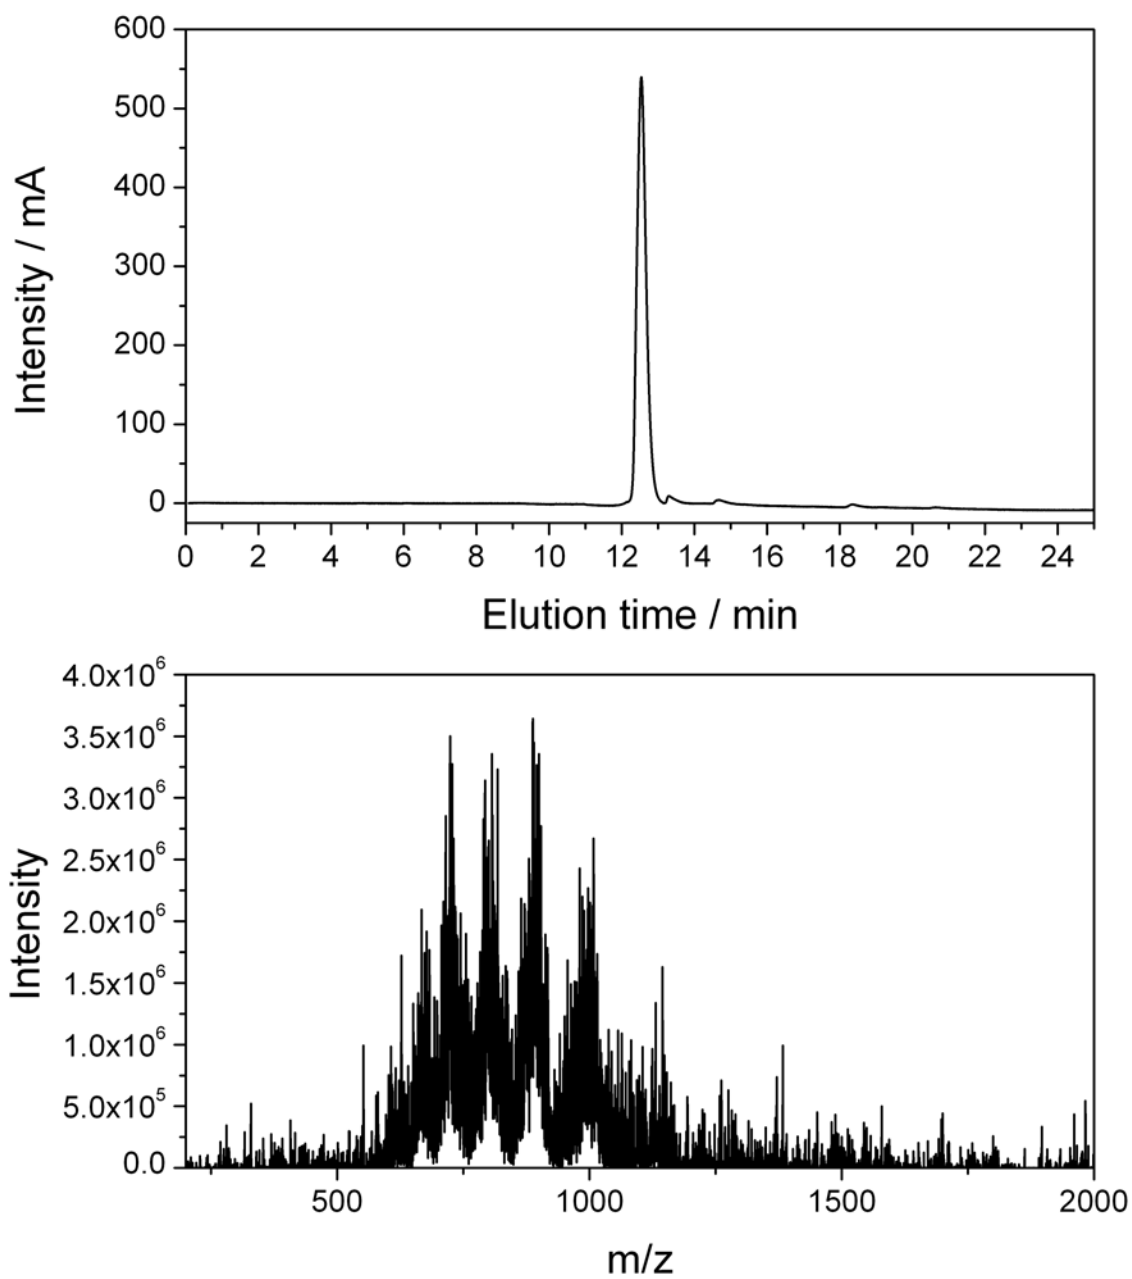

**Figure S10.** LC-MS spectrum of **Dpa-(Cys-PEG<sub>2kDa</sub>)-PNA**.

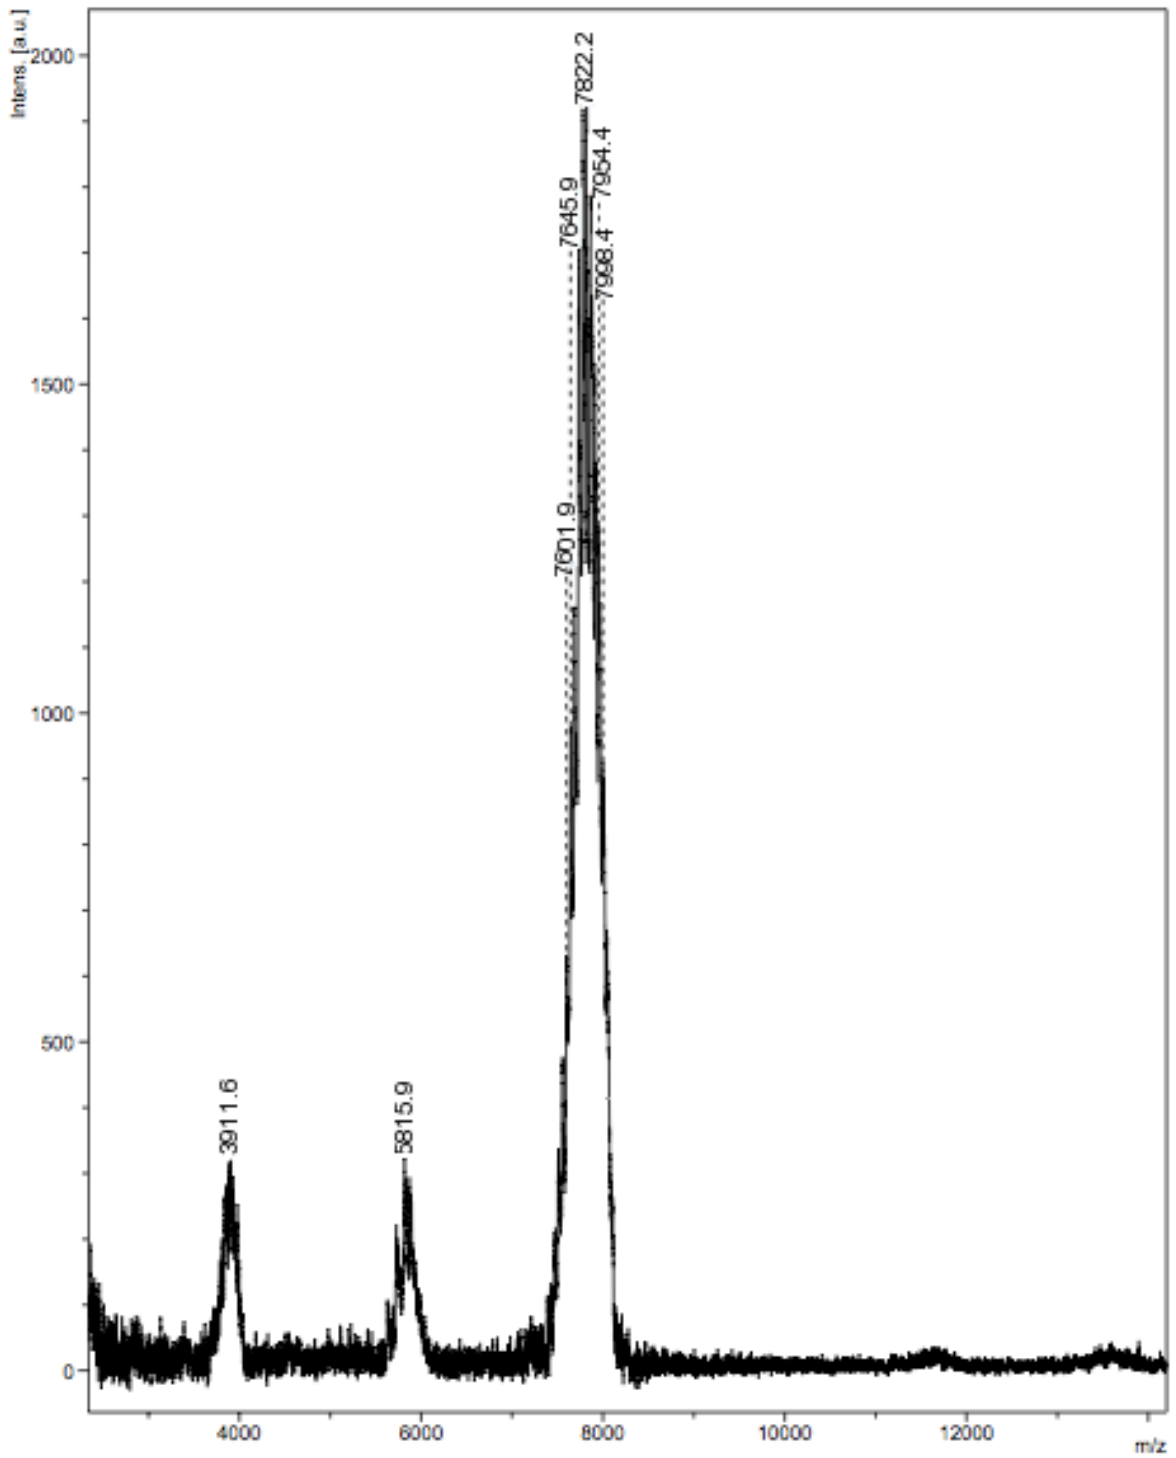

**Figure S11.** MALDI-TOF spectrum of **Dpa-(Cys-PEG<sub>2kDa</sub>)-PNA**.

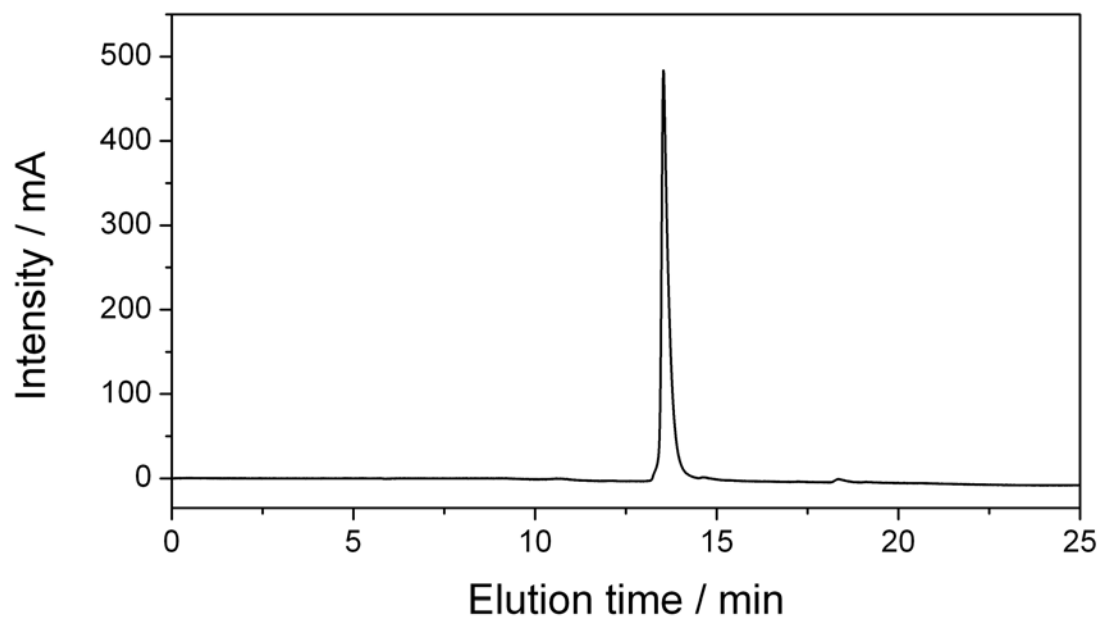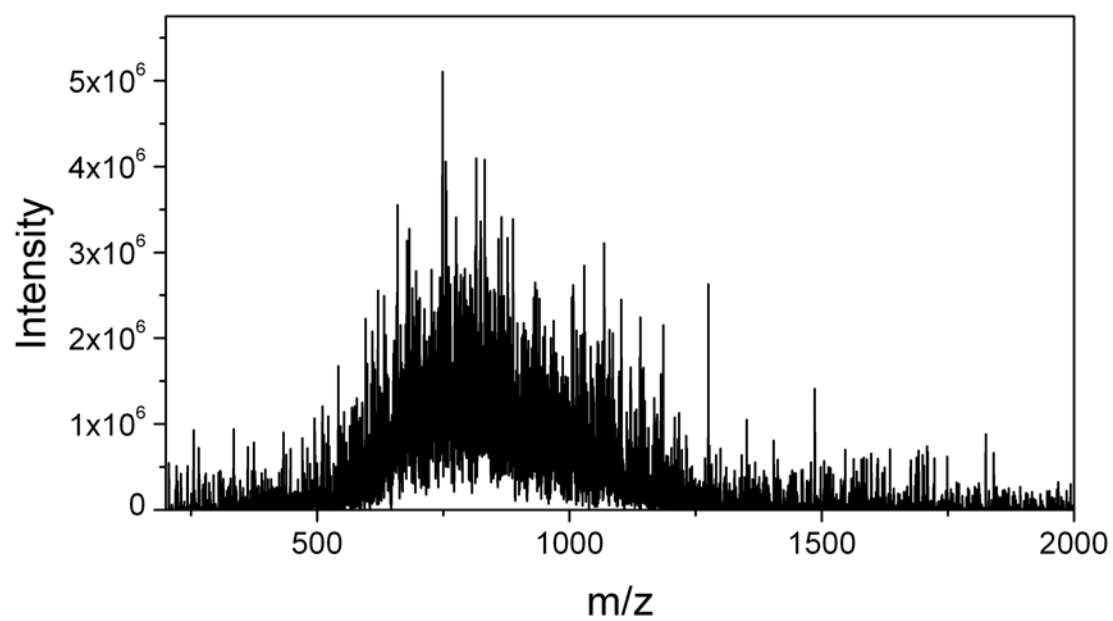

**Figure S12.** LC-MS spectrum of **Dpa-(Cys-PEG<sub>10kDa</sub>)-PNA**.

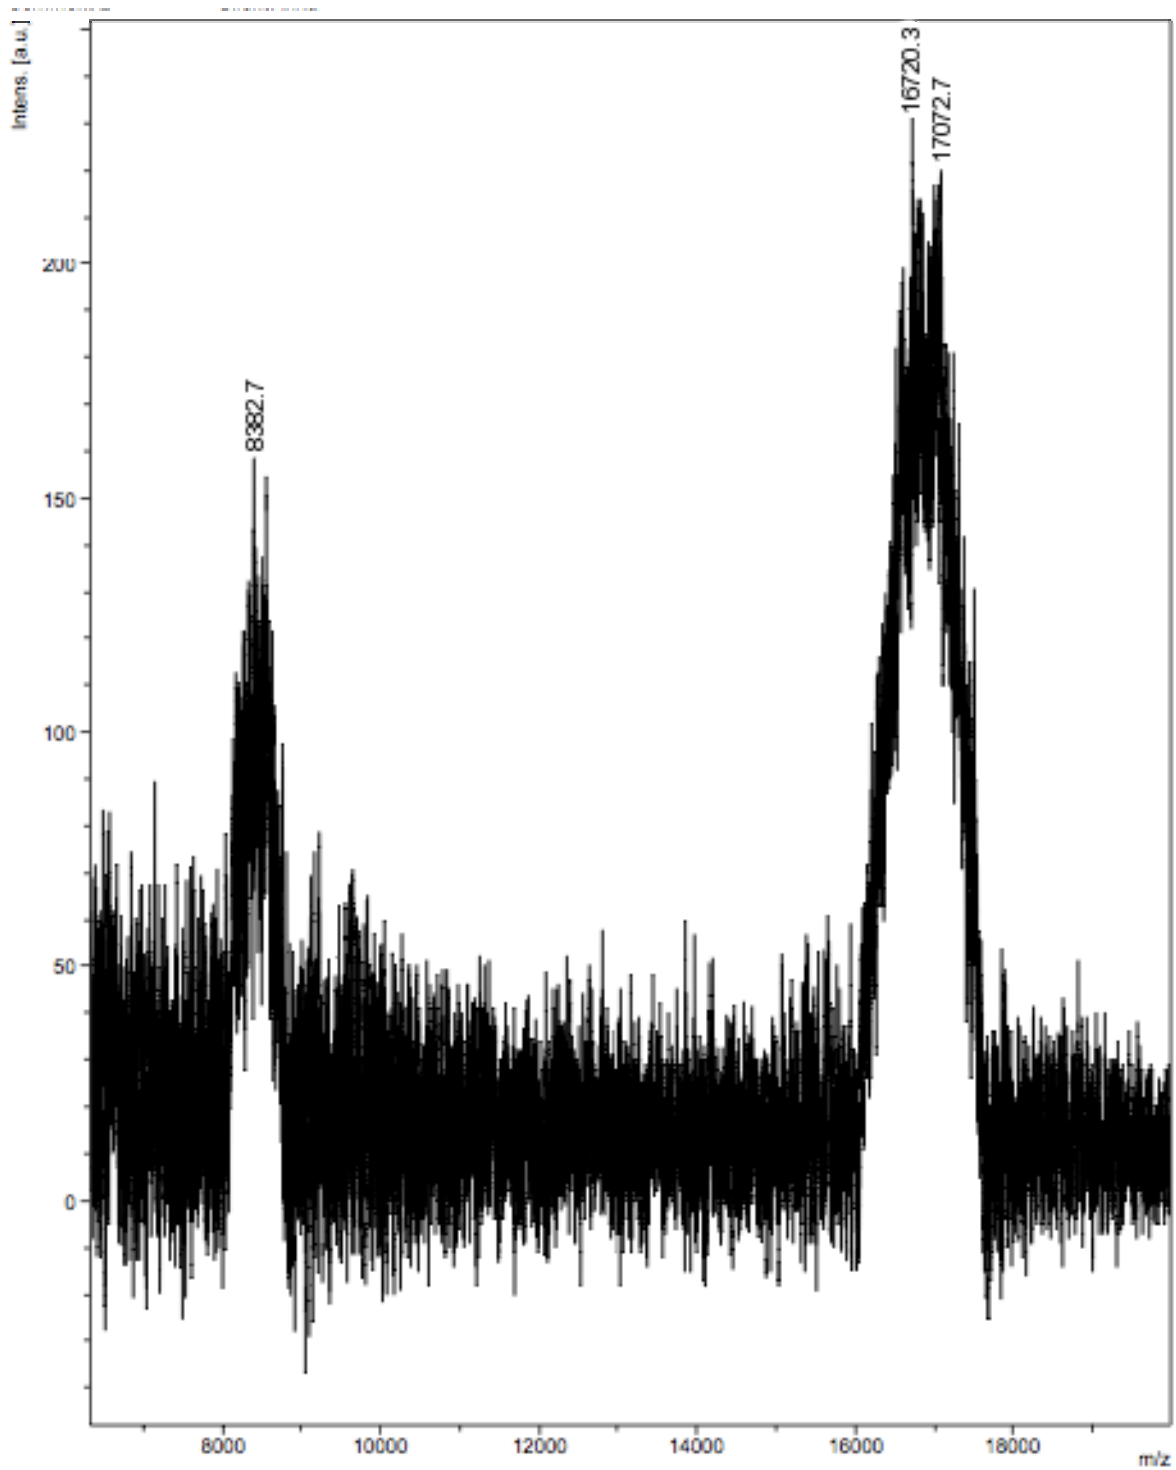

**Figure S13.** MALDI-TOF spectrum of **Dpa-(Cys-PEG<sub>10kDa</sub>)-PNA**.

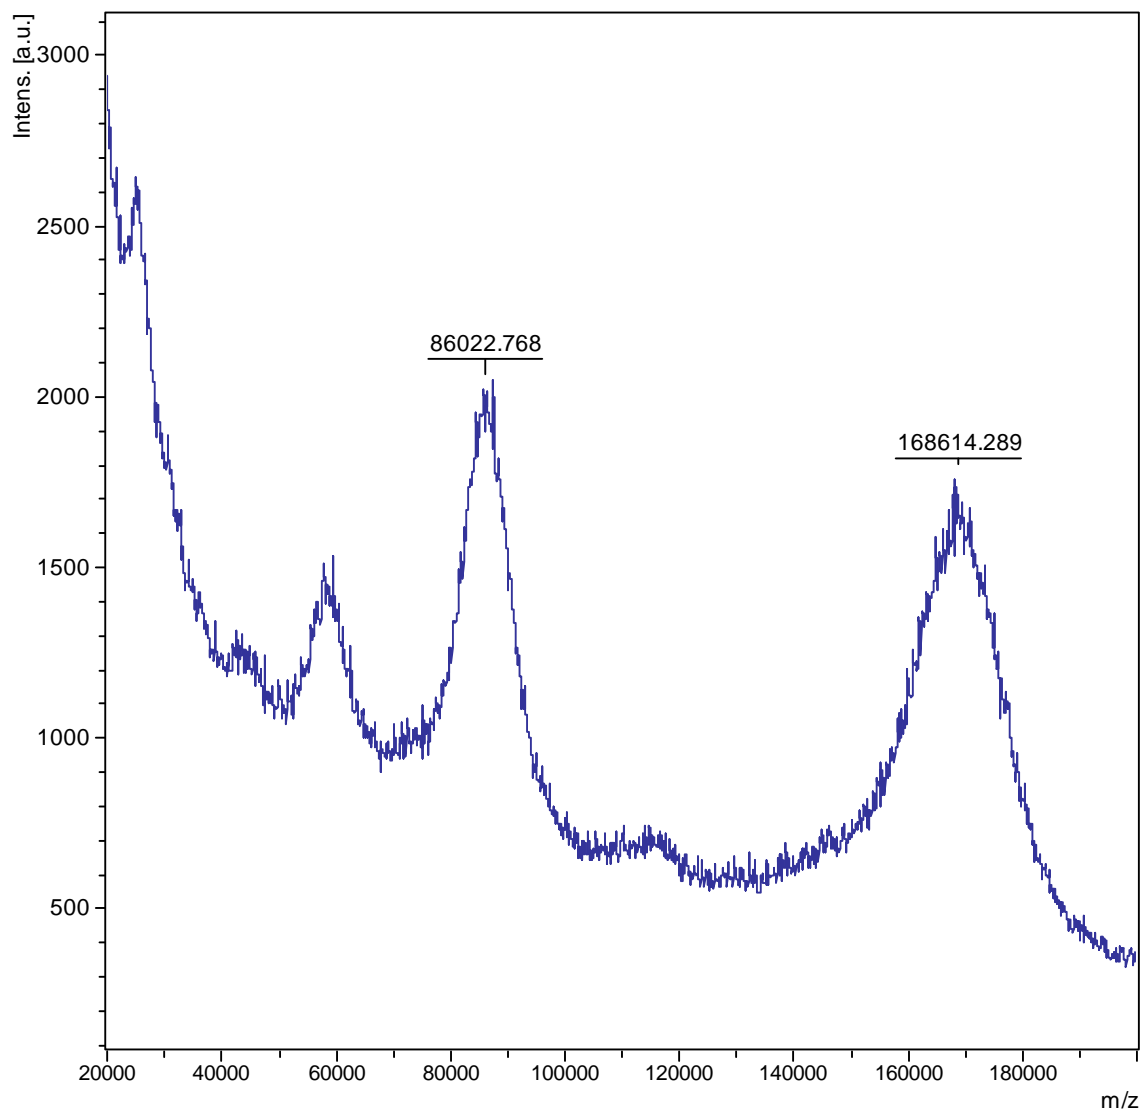

**Figure S14.** MALDI-TOF spectrum of  $(\text{NOTA})_3\text{-C225-(Cys-PNA)}_2$ .

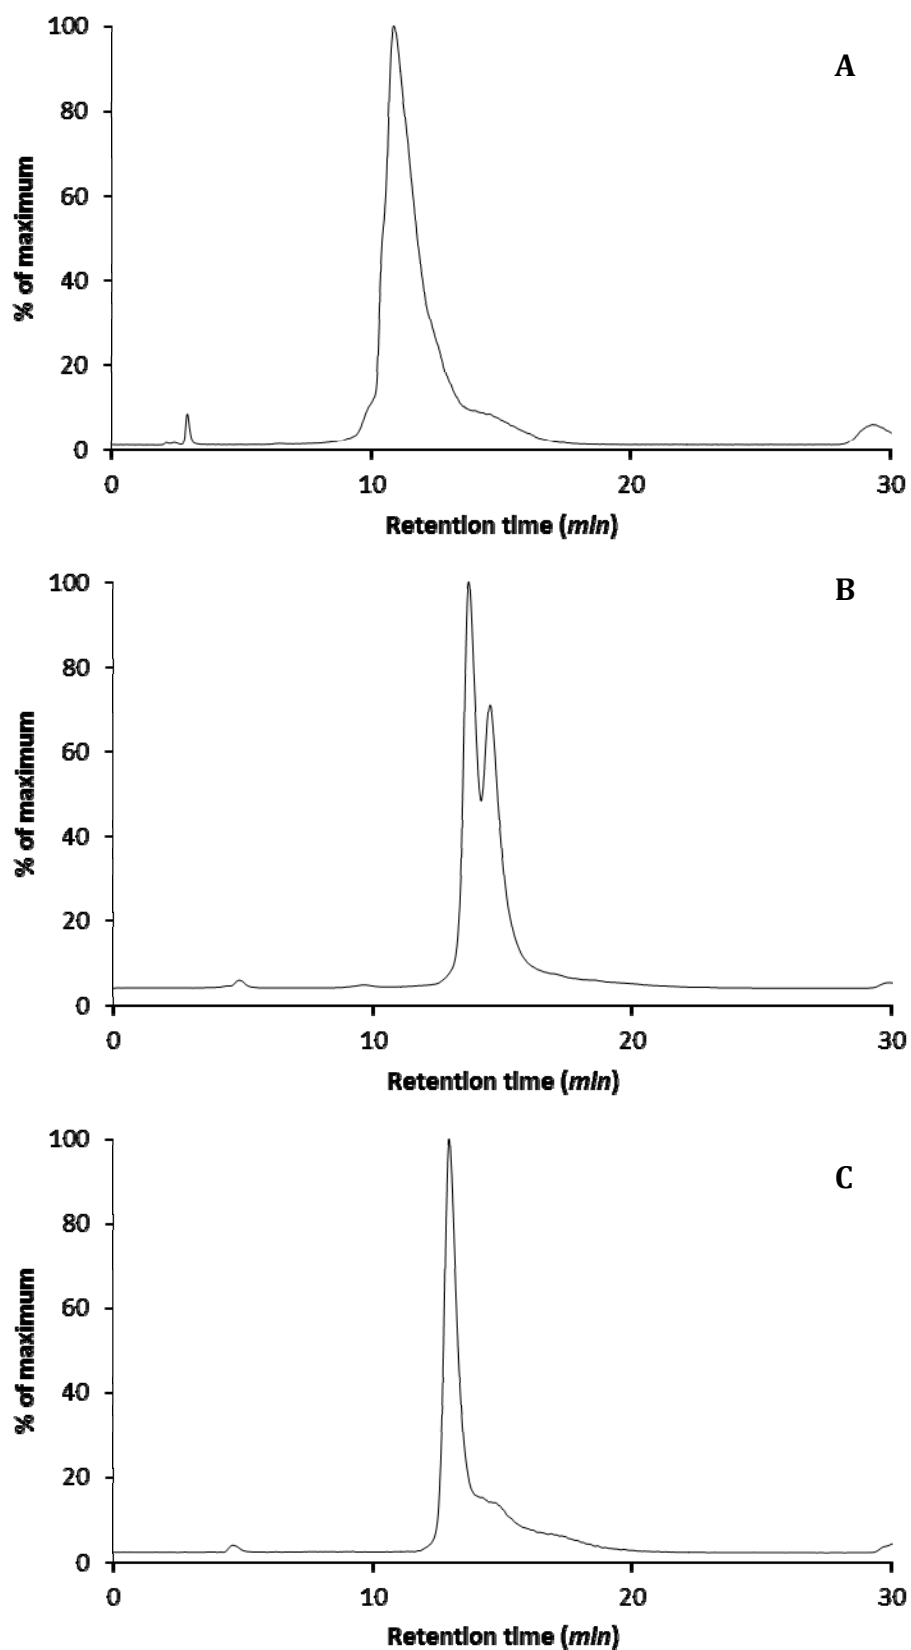

Figure S15. Radio-HPLC of [ $^{99m}\text{Tc}$ ]Tc-Dpa-PNA (A), [ $^{99m}\text{Tc}$ ]Tc-Dpa-(Cys-PEG<sub>2kDa</sub>)-PNA (B) and [ $^{99m}\text{Tc}$ ]Tc-Dpa-(Cys-PEG<sub>10kDa</sub>)-PNA (C).

**Table S1.** Melting temperatures ( $T_M$ ) for three complementary 17-mer PNA systems differing in their degree of PEGylation (0/2/10 kDa). Values were measured as duplicates.

| <b>Complementary PNA system</b>                          | <b><math>T_M</math> [°C]</b> |
|----------------------------------------------------------|------------------------------|
| <b>Cys-c-PNA &amp; Dpa-PNA</b>                           | $76.5 \pm 1.2$               |
| <b>Cys-c-PNA &amp; Dpa-(Cys-PEG<sub>2kDa</sub>)-PNA</b>  | $76.8 \pm 1.4$               |
| <b>Cys-c-PNA &amp; Dpa-(Cys-PEG<sub>10kDa</sub>)-PNA</b> | $76.1 \pm 1.3$               |



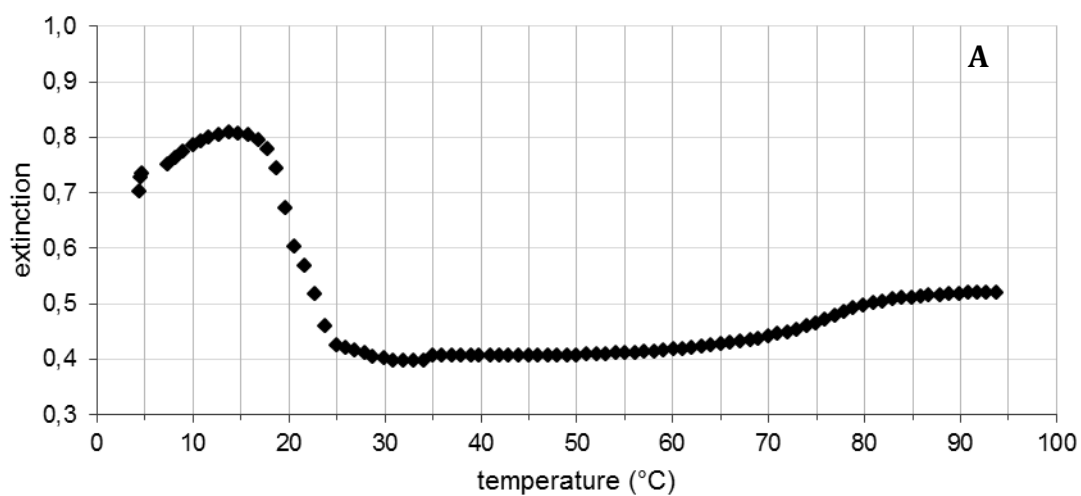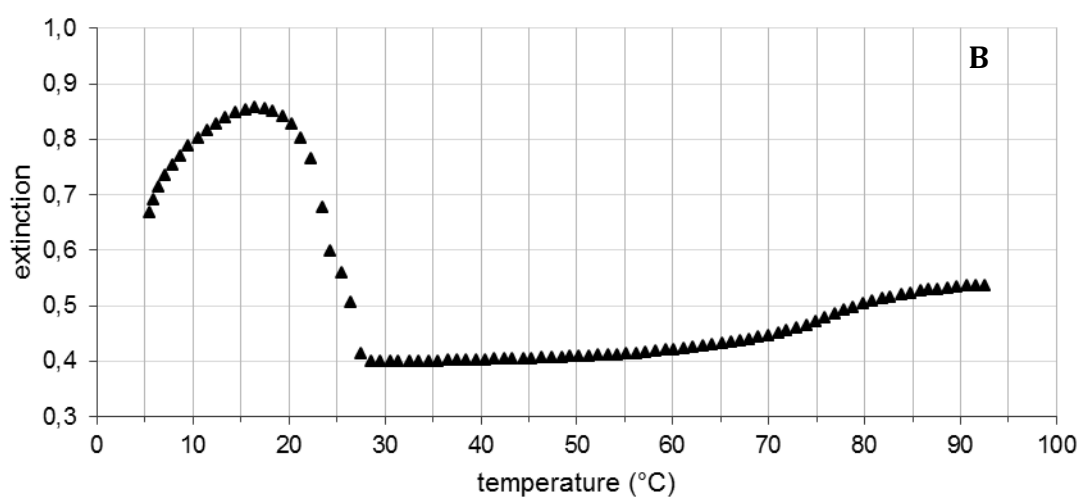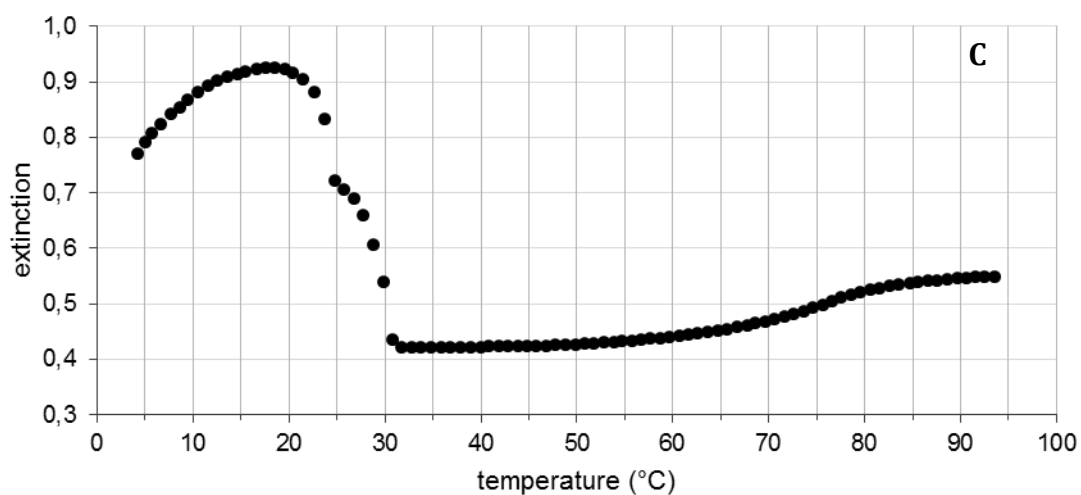

**Figure S16.** Melting curves of Cys-c-PNA & Dpa-PNA (A), Cys-c-PNA & Dpa-(Cys-PEG<sub>2kDa</sub>)-PNA (B) and Cys-c-PNA & Dpa-(Cys-PEG<sub>10kDa</sub>)-PNA (C).

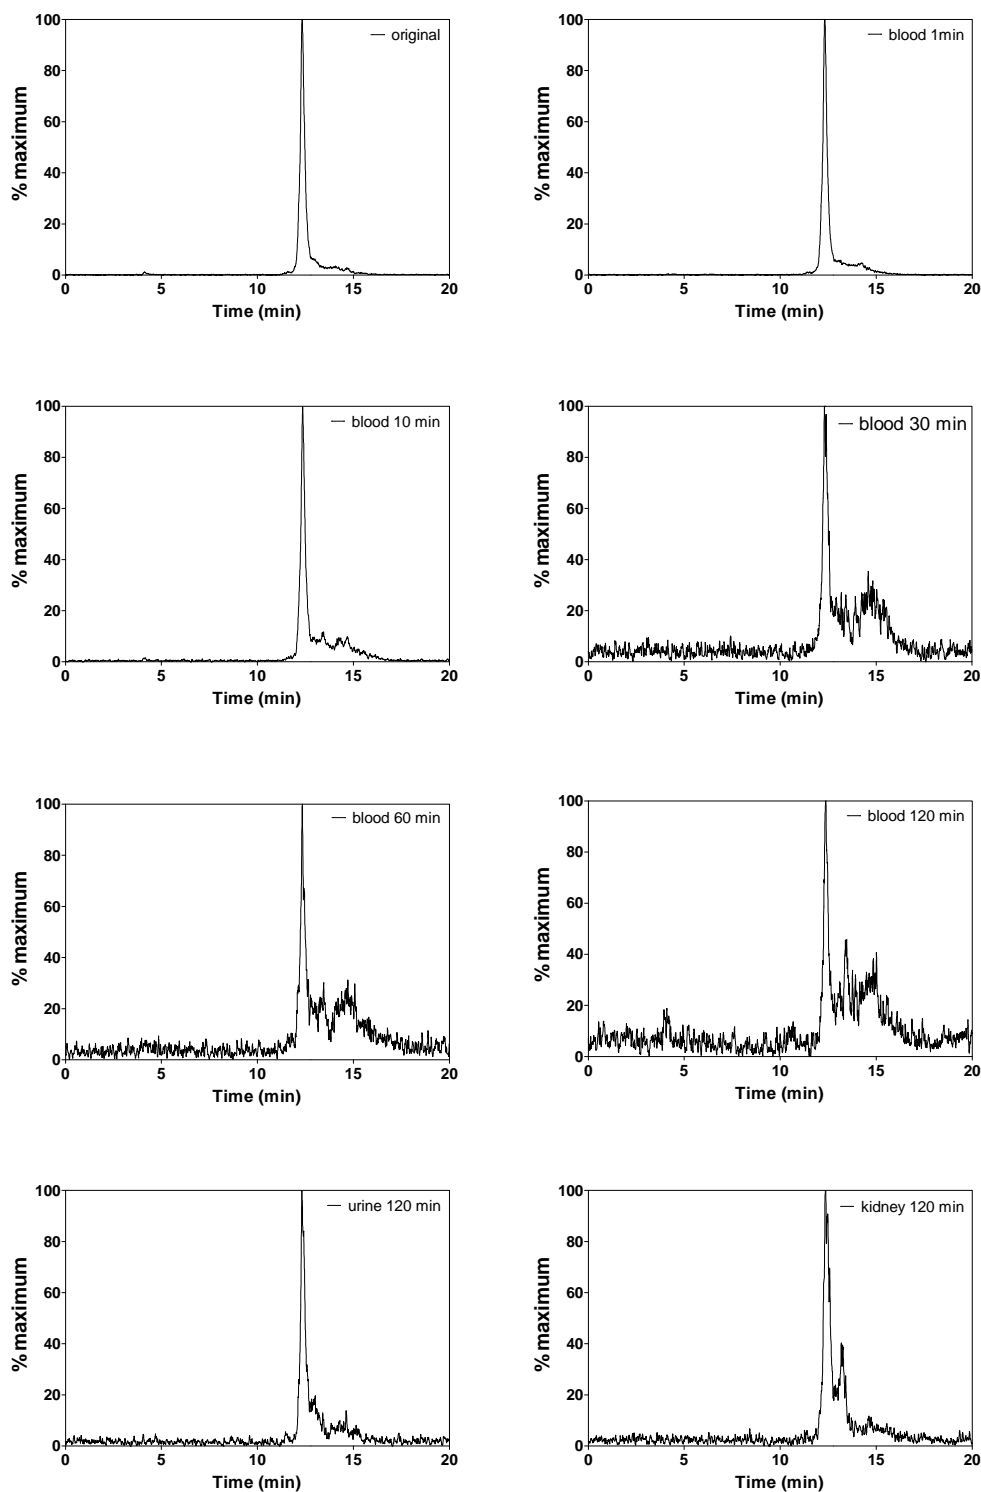

**Figure S17.** Radio HPLC of the  $[^{99m}\text{Tc}](\text{Tc-Dpa})-(\text{Cys-PEG}_{10\text{kDa}})\text{-PNA}$  (original), in rat arterial blood plasma after various times, and in extracts of kidneys and urine at 120 min after injection (the noisy signal around 16 minutes is due to low activity of the samples).

**Table S2.** Biodistribution of [<sup>99m</sup>Tc](Tc-Dpa)-PNA (337±94 kBq), [<sup>99m</sup>Tc](Tc-Dpa)-(Cys-PEG<sub>2kDa</sub>)-PNA (325±25 kBq), and [<sup>99m</sup>Tc](Tc-Dpa)-(Cys-PEG<sub>10kDa</sub>)-PNA (300±32 kBq) in Wistar rats after single intravenous injection at 5 min and 60 min p.i. Data are presented as %ID mean±SD (number of animals) and P values from t-test between the study groups

| Compound      | [ <sup>99m</sup> Tc](Tc-Dpa)-PNA |                  | [ <sup>99m</sup> Tc](Tc-Dpa)-(Cys-PEG <sub>2kDa</sub> )-PNA |                 | [ <sup>99m</sup> Tc](Tc-Dpa)-(Cys-PEG <sub>10kDa</sub> )-PNA |                  | 0k-2k  | 0k-2k  | 0k-10k | 0k-10k | 2k-10k | 2k-10k |
|---------------|----------------------------------|------------------|-------------------------------------------------------------|-----------------|--------------------------------------------------------------|------------------|--------|--------|--------|--------|--------|--------|
|               | 5                                | 60               | 5                                                           | 60              | 5                                                            | 60               | 5 min  | 60 min | 5 min  | 60 min | 5 min  | 60 min |
| %ID           | mean                             | mean             | mean                                                        | mean            | mean                                                         | mean             |        |        |        |        |        |        |
| Brain         | 0.04 ± 0.01 (12)                 | 0.01 ± 0 (11)    | 0.11 ± 0.02 (8)                                             | 0.02 ± 0.00 (8) | 0.06 ± 0.01 (8)                                              | 0.02 ± 0.02 (8)  | 0.0000 | 0.0001 | 0.0002 | 0.0947 | 0.0001 | 0.7017 |
| Pancreas      | 0.10 ± 0.06 (12)                 | 0.03 ± 0.03 (11) | 0.11 ± 0.01 (8)                                             | 0.15 ± 0.30 (8) | 0.08 ± 0.01 (8)                                              | 0.05 ± 0.04 (8)  | 0.7038 | 0.2233 | 0.2885 | 0.1947 | 0.0002 | 0.4107 |
| Spleen        | 0.14 ± 0.06 (12)                 | 0.06 ± 0.01 (11) | 0.15 ± 0.03 (8)                                             | 0.12 ± 0.08 (8) | 0.22 ± 0.08 (8)                                              | 0.18 ± 0.08 (8)  | 0.7518 | 0.0239 | 0.0222 | 0.0003 | 0.0374 | 0.1886 |
| Adrenals      | 0.02 ± 0.00 (12)                 | 0.00 ± 0.00 (11) | 0.03 ± 0.01 (8)                                             | 0.01 ± 0.00 (8) | 0.03 ± 0.01 (8)                                              | 0.01 ± 0.01 (8)  | 0.0001 | 0.0002 | 0.0030 | 0.0301 | 0.2741 | 0.3425 |
| Kidneys       | 11.2 ± 1.29 (12)                 | 13.0 ± 1.66 (11) | 12.7 ± 2.01 (8)                                             | 10.6 ± 2.18 (8) | 13.0 ± 1.92 (8)                                              | 10.2 ± 1.30 (8)  | 0.0728 | 0.0216 | 0.0342 | 0.0019 | 0.8149 | 0.6971 |
| Heart         | 0.22 ± 0.03 (12)                 | 0.04 ± 0.02 (11) | 0.38 ± 0.14 (8)                                             | 0.08 ± 0.03 (8) | 0.29 ± 0.04 (8)                                              | 0.06 ± 0.02 (8)  | 0.0025 | 0.0037 | 0.0006 | 0.0648 | 0.1466 | 0.1336 |
| Lung          | 0.70 ± 0.13 (12)                 | 0.15 ± 0.05 (11) | 1.09 ± 0.16 (8)                                             | 0.32 ± 0.13 (8) | 1.84 ± 0.47 (8)                                              | 1.75 ± 1.14 (8)  | 0.0000 | 0.0017 | 0.0000 | 0.0004 | 0.0012 | 0.0050 |
| Thymus        | 0.17 ± 0.05 (12)                 | 0.03 ± 0.01 (11) | 0.18 ± 0.03 (8)                                             | 0.04 ± 0.01 (8) | 0.18 ± 0.04 (8)                                              | 0.04 ± 0.01 (8)  | 0.6824 | 0.1060 | 0.8910 | 0.1558 | 0.7711 | 0.5819 |
| Thyroid       | 0.07 ± 0.01 (12)                 | 0.02 ± 0.01 (11) | 0.16 ± 0.22 (8)                                             | 0.04 ± 0.03 (8) | 0.07 ± 0.02 (8)                                              | 0.03 ± 0.03 (8)  | 0.1786 | 0.0995 | 0.9229 | 0.3412 | 0.2761 | 0.6210 |
| Hard. Gl.     | 0.08 ± 0.01 (12)                 | 0.02 ± 0.00 (11) | 0.09 ± 0.01 (8)                                             | 0.02 ± 0.01 (8) | 0.08 ± 0.02 (8)                                              | 0.03 ± 0.01 (8)  | 0.2546 | 0.0038 | 0.4426 | 0.0334 | 0.8037 | 0.7293 |
| Liver         | 5.45 ± 0.53 (12)                 | 5.04 ± 0.54 (11) | 5.45 ± 0.92 (8)                                             | 3.44 ± 1.21 (8) | 5.64 ± 1.55 (8)                                              | 5.19 ± 1.86 (8)  | 0.9993 | 0.0018 | 0.7085 | 0.8067 | 0.7794 | 0.0547 |
| Femur         | 0.30 ± 0.04 (12)                 | 0.09 ± 0.02 (11) | 0.32 ± 0.02 (8)                                             | 0.10 ± 0.02 (8) | 0.28 ± 0.04 (8)                                              | 0.09 ± 0.02 (8)  | 0.3266 | 0.1690 | 0.4031 | 0.8401 | 0.0941 | 0.1956 |
| Testicles     | 0.33 ± 0.13 (12)                 | 0.12 ± 0.02 (11) | 0.47 ± 0.08 (8)                                             | 0.22 ± 0.04 (8) | 0.51 ± 0.22 (8)                                              | 0.19 ± 0.02 (8)  | 0.0210 | 0.0000 | 0.0403 | 0.0000 | 0.6060 | 0.1221 |
| Intestine#    | 2.54 ± 0.63 (12)                 | 3.24 ± 1.74 (11) | 3.23 ± 0.26 (8)                                             | 5.17 ± 2.59 (7) | 2.94 ± 0.27 (8)                                              | 6.76 ± 5.42 (8)  | 0.0123 | 0.0930 | 0.1244 | 0.0733 | 0.0600 | 0.5202 |
| Stomach#      | 0.62 ± 0.12 (12)                 | 2.51 ± 1.54 (11) | 0.96 ± 0.41 (8)                                             | 2.75 ± 2.97 (7) | 0.89 ± 0.14 (8)                                              | 4.31 ± 5.90 (8)  | 0.0198 | 0.8310 | 0.0003 | 0.3727 | 0.6961 | 0.5668 |
| Carcass       | 54.4 ± 6.45 (12)                 | 17.8 ± 2.9 (11)  | 53.5 ± 12.5 (8)                                             | 15.6 ± 2.26 (8) | 64.4 ± 9.66 (8)                                              | 12.8 ± 2.24 (8)  | 0.8534 | 0.0969 | 0.0161 | 0.0012 | 0.0893 | 0.0376 |
| Urine calc.## | 22.0 ± 6.81 (12)                 | 57.5 ± 4.26 (11) | 18.5 ± 11.5 (8)                                             | 59.6 ± 5.79 (8) | 8.15 ± 8.92 (8)                                              | 57.9 ± 13.21 (8) | 0.4309 | 0.3891 | 0.0016 | 0.9211 | 0.0821 | 0.7594 |

# with content, ## urine was calculated from the injected activity and recovery of all organs and carcass

**Table S3.** Biodistribution of [<sup>99m</sup>Tc](Tc-Dpa)-PNA (337±94 kBq), [<sup>99m</sup>Tc](Tc-Dpa)-(Cys-PEG<sub>2kDa</sub>)-PNA (325±25 kBq), and [<sup>99m</sup>Tc](Tc-Dpa)-(Cys-PEG<sub>10kDa</sub>)-PNA (300±32 kBq) in Wistar rats after single intravenous injection at 5 min and 60 min p.i. Data are presented as SUV mean±SD (number of animals) and P values from t-test between the study groups.

| Compound    | [ <sup>99m</sup> Tc](Tc-Dpa)-PNA |                  | [ <sup>99m</sup> Tc](Tc-Dpa)-(Cys-PEG <sub>2kDa</sub> )-PNA |                 | [ <sup>99m</sup> Tc](Tc-Dpa)-(Cys-PEG <sub>10kDa</sub> )-PNA |                 | 0k-2k  | 0k-2k  | 0k-10k | 0k-10k | 2k-10k | 2k-10k |
|-------------|----------------------------------|------------------|-------------------------------------------------------------|-----------------|--------------------------------------------------------------|-----------------|--------|--------|--------|--------|--------|--------|
|             | 5                                | 60               | 5                                                           | 60              | 5                                                            | 60              | 5 min  | 5 min  | 60 min | 60 min | 5 min  | 60 min |
| SUV         | mean                             | mean             | mean                                                        | mean            | mean                                                         | mean            |        |        |        |        |        |        |
| Blood       | 1.35 ± 0.21 (12)                 | 0.24 ± 0.1 (11)  | 1.15 ± 0.12 (8)                                             | 0.24 ± 0.06 (8) | 2.01 ± 0.35 (8)                                              | 0.34 ± 0.10 (8) | 0.0001 | 0.0521 | 0.0277 | 0.8568 | 0.0000 | 0.0522 |
| BAT         | 0.44 ± 0.04 (12)                 | 0.08 ± 0.02 (11) | 0.62 ± 0.07 (8)                                             | 0.17 ± 0.07 (8) | 0.49 ± 0.07 (8)                                              | 0.15 ± 0.04 (8) | 0.0405 | 0.0001 | 0.0000 | 0.0003 | 0.0046 | 0.3584 |
| Hair & skin | 0.80 ± 0.06 (12)                 | 0.24 ± 0.1 (11)  | 0.93 ± 0.08 (8)                                             | 0.24 ± 0.02 (8) | 0.86 ± 0.18 (8)                                              | 0.27 ± 0.07 (8) | 0.3095 | 0.4714 | 0.0007 | 0.8967 | 0.3266 | 0.1888 |
| Brain       | 0.04 ± 0.01 (12)                 | 0.01 ± 0.00 (11) | 0.04 ± 0.00 (8)                                             | 0.02 ± 0.02 (8) | 0.07 ± 0.01 (8)                                              | 0.01 ± 0.00 (8) | 0.0000 | 0.0064 | 0.9357 | 0.2175 | 0.0001 | 0.6622 |
| Pancreas    | 0.53 ± 0.29 (12)                 | 0.14 ± 0.15 (11) | 0.35 ± 0.04 (8)                                             | 0.26 ± 0.23 (8) | 0.51 ± 0.05 (8)                                              | 0.61 ± 1.16 (8) | 0.9769 | 0.2284 | 0.1548 | 0.2189 | 0.0000 | 0.4466 |
| Spleen      | 0.60 ± 0.30 (12)                 | 0.22 ± 0.04 (11) | 0.92 ± 0.27 (8)                                             | 0.70 ± 0.31 (8) | 0.60 ± 0.12 (8)                                              | 0.54 ± 0.43 (8) | 0.9215 | 0.0373 | 0.0304 | 0.0002 | 0.0137 | 0.4235 |
| Adrenals    | 0.57 ± 0.11 (12)                 | 0.14 ± 0.04 (11) | 0.80 ± 0.23 (8)                                             | 0.32 ± 0.19 (8) | 0.82 ± 0.15 (8)                                              | 0.25 ± 0.07 (8) | 0.0006 | 0.0007 | 0.0118 | 0.0110 | 0.8535 | 0.3944 |
| Kidneys     | 11.6 ± 1.53 (12)                 | 13.1 ± 1.90 (11) | 12.0 ± 1.33 (8)                                             | 9.29 ± 1.04 (8) | 11.31 ± 1.74 (8)                                             | 9.75 ± 2.47 (8) | 0.6211 | 0.0056 | 0.6869 | 0.0001 | 0.4263 | 0.6561 |
| WAT         | 0.67 ± 0.73 (12)                 | 0.13 ± 0.22 (11) | 1.38 ± 1.46 (8)                                             | 0.17 ± 0.1 (8)  | 0.94 ± 0.61 (8)                                              | 0.23 ± 0.15 (8) | 0.3749 | 0.3425 | 0.1698 | 0.6938 | 0.4692 | 0.4164 |
| Muscle      | 0.39 ± 0.16 (12)                 | 0.05 ± 0.01 (11) | 0.35 ± 0.03 (8)                                             | 0.09 ± 0.04 (8) | 0.30 ± 0.08 (8)                                              | 0.13 ± 0.09 (8) | 0.2140 | 0.0212 | 0.5652 | 0.0183 | 0.1676 | 0.2966 |
| Heart       | 0.57 ± 0.06 (12)                 | 0.10 ± 0.03 (11) | 0.64 ± 0.05 (8)                                             | 0.13 ± 0.03 (8) | 0.81 ± 0.19 (8)                                              | 0.17 ± 0.05 (8) | 0.0019 | 0.0047 | 0.0353 | 0.1301 | 0.0479 | 0.0950 |
| Lung        | 1.06 ± 0.17 (12)                 | 0.22 ± 0.06 (11) | 2.39 ± 0.64 (8)                                             | 2.15 ± 1.27 (8) | 1.41 ± 0.23 (8)                                              | 0.42 ± 0.15 (8) | 0.0016 | 0.0016 | 0.0000 | 0.0002 | 0.0020 | 0.0030 |
| Thymus      | 0.47 ± 0.09 (12)                 | 0.10 ± 0.02 (11) | 0.46 ± 0.07 (8)                                             | 0.10 ± 0.01 (8) | 0.45 ± 0.05 (8)                                              | 0.12 ± 0.04 (8) | 0.7261 | 0.0953 | 0.9181 | 0.7126 | 0.7956 | 0.1672 |
| Hard. Gl.   | 0.58 ± 0.08 (12)                 | 0.12 ± 0.03 (11) | 0.58 ± 0.17 (8)                                             | 0.18 ± 0.14 (8) | 0.59 ± 0.08 (8)                                              | 0.17 ± 0.04 (8) | 0.6080 | 0.0072 | 0.8788 | 0.1759 | 0.8870 | 0.7768 |
| Liver       | 0.89 ± 0.22 (12)                 | 0.85 ± 0.25 (11) | 1.12 ± 0.39 (8)                                             | 0.98 ± 0.39 (8) | 1.15 ± 0.19 (8)                                              | 0.73 ± 0.28 (8) | 0.0293 | 0.3722 | 0.1681 | 0.4097 | 0.8543 | 0.1917 |
| Femur       | 0.55 ± 0.03 (12)                 | 0.16 ± 0.02 (11) | 0.45 ± 0.01 (8)                                             | 0.14 ± 0.03 (8) | 0.51 ± 0.06 (8)                                              | 0.17 ± 0.04 (8) | 0.0631 | 0.8277 | 0.0000 | 0.0541 | 0.0152 | 0.1546 |
| Testicles   | 0.25 ± 0.12 (12)                 | 0.09 ± 0.01 (11) | 0.34 ± 0.13 (8)                                             | 0.13 ± 0.02 (8) | 0.34 ± 0.08 (8)                                              | 0.16 ± 0.03 (8) | 0.1033 | 0.0000 | 0.1403 | 0.0006 | 0.9169 | 0.1295 |

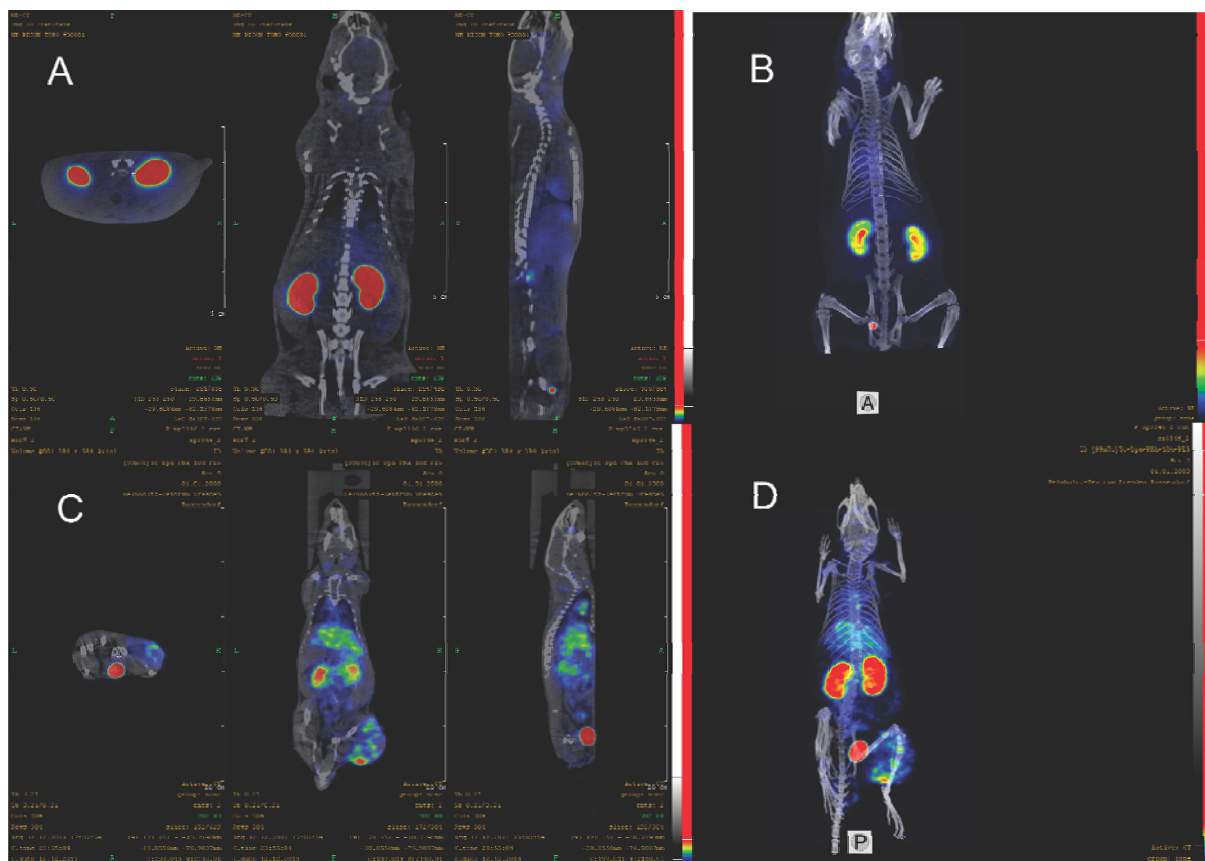

**Figure S18.** SPECT/CT comparison of the biodistribution of  $[^{99m}\text{Tc}](\text{Tc-Dpa})\text{-(Cys-PEG}_{10\text{kDa}})\text{-PNA}$  in rat and mouse. Upper images: Orthogonal (A) (transaxial, coronal, sagittal) sections and (B) maximum intensity projection of  $[^{99m}\text{Tc}](\text{Tc-Dpa})\text{-(Cys-PEG}_{10\text{kDa}})\text{-PNA}$  (56 MBq) in a Wistar rat (3 h p.i.). Lower images: Orthogonal (C) (transaxial, coronal, sagittal) sections and (D) maximum intensity projection of  $[^{99m}\text{Tc}](\text{Tc-Dpa})\text{-(Cys-PEG}_{10\text{kDa}})\text{-PNA}$  (40 MBq) in a NMRI nu/nu A431 tumor bearing mouse (3 h p.i.). The radiotracer  $[^{99m}\text{Tc}](\text{Tc-Dpa})\text{-(Cys-PEG}_{10\text{kDa}})\text{-PNA}$  was applied 24 h after injection of 4 nmol  $(\text{NOTA})_3\text{-C225-Cys-c-PNA}$ .
